# Supplementary material
Source: HighWire-hosted journal article supplement (https://bmjopen.bmj.com/content/13/7/e074835)
Supplement: inline-supplementary-material-1 [file inline-supplementary-material-1.pdf]

**Table S1:** Characteristics of cohort participants with or without missing values compared to randomly selected individuals from the French population.

|            |                   | Representative sample of the French population |      | Whole cohort |      | Cohort without missing value |      | Comparing representative sample of the French population and whole cohort | Comparing representative sample of the French population and cohort without missing value | Comparing whole cohort and cohort without missing value |
|------------|-------------------|------------------------------------------------|------|--------------|------|------------------------------|------|---------------------------------------------------------------------------|-------------------------------------------------------------------------------------------|---------------------------------------------------------|
|            |                   | n                                              | %    | n            | %    | n                            | %    | Cohen's h                                                                 | Cohen's h                                                                                 | Cohen's h                                               |
| -          | All               | 24,242                                         | -    | 205,203      | -    | 130,197                      | -    | -                                                                         | -                                                                                         | -                                                       |
| Sex        | Women             | 12,745                                         | 52.6 | 110,193      | 53.7 | 66,743                       | 51.3 | -0.022                                                                    | 0.026                                                                                     | 0.048                                                   |
|            | Men               | 11,497                                         | 47.4 | 95,010       | 46.3 | 63,454                       | 48.7 | 0.022                                                                     | -0.026                                                                                    | -0.048                                                  |
| Age (y)    | 18-39             | 9657                                           | 39.9 | 66,832       | 32.6 | 46,892                       | 36.0 | 0.152                                                                     | 0.080                                                                                     | -0.072                                                  |
|            | 40-54             | 7717                                           | 31.8 | 69,100       | 33.6 | 43,443                       | 33.4 | -0.038                                                                    | -0.034                                                                                    | 0.004                                                   |
|            | 55-75             | 6868                                           | 28.4 | 69,271       | 33.8 | 39,862                       | 30.6 | -0.117                                                                    | -0.048                                                                                    | 0.069                                                   |
| Education  | University        | 6022                                           | 24.9 | 118,646      | 58.9 | 82,930                       | 64.2 | -0.705**                                                                  | -0.814***                                                                                 | -0.109                                                  |
|            | Secondary school  | 11,643                                         | 48.0 | 33,246       | 16.5 | 20,748                       | 16.1 | 0.694**                                                                   | 0.705**                                                                                   | 0.011                                                   |
|            | Primary school    | 6577                                           | 27.1 | 49,538       | 24.6 | 25,431                       | 19.7 | 0.057                                                                     | 0.175                                                                                     | 0.118                                                   |
| Occupation | Management        | 3103                                           | 15.5 | 58,441       | 32.2 | 42,099                       | 35.8 | -0.398*                                                                   | -0.474*                                                                                   | -0.076                                                  |
|            | Intermediate      | 5060                                           | 25.2 | 54,114       | 29.9 | 35,885                       | 30.6 | -0.105                                                                    | -0.121                                                                                    | -0.015                                                  |
|            | Blue collar/clerk | 11,900                                         | 59.3 | 68,817       | 37.9 | 39,505                       | 33.6 | 0.432*                                                                    | 0.521**                                                                                   | 0.090                                                   |

The percentages were calculated relatively to the number of cohort participants with or without missing values or of individuals randomly selected from the French population; Each pair of proportions was compared using Cohen's h measure of effect size with the rule of thumb to categorize substantial differences as \*small ( $0.2 \leq h < 0.5$ ), \*\*medium ( $0.5 \leq h < 0.8$ ) or \*\*\*large ( $h \geq 0.8$ ).

**Table S2:** Indicators of social position of participants at inclusion.

|                      |                   | n      | %    |
|----------------------|-------------------|--------|------|
| Education (y)        | ≥17               | 35,557 | 27.5 |
|                      | 14-16             | 47,373 | 36.7 |
|                      | 12-13             | 20,748 | 16.1 |
|                      | ≤11               | 25,431 | 19.7 |
| Occupation           | Management        | 42,099 | 35.8 |
|                      | Intermediate      | 35,885 | 30.6 |
|                      | Blue collar/clerk | 39,505 | 33.6 |
| Income               | Very high         | 39,952 | 32.6 |
|                      | High              | 40,396 | 32.9 |
|                      | Middle            | 31,339 | 25.5 |
|                      | Low               | 11,019 | 9.0  |
| Spouse occupation    | Management        | 32,048 | 34.7 |
|                      | Intermediate      | 25,037 | 27.1 |
|                      | Blue collar/clerk | 35,268 | 38.2 |
| Social vulnerability | Low               | 40,116 | 30.9 |
|                      | Average           | 45,849 | 35.4 |
|                      | High              | 43,729 | 33.7 |

The percentages were calculated relatively to the total number of participants in the cohort.

**Figure S1:** Multiple correspondence analysis showing the association between the different indicators used to characterize social position of participants at inclusion. The plot uses the two first dimensions which explain respectively 18.3 and 11.7% of the total inertia (60.9 and 8.9% with Greenacre adjustment).

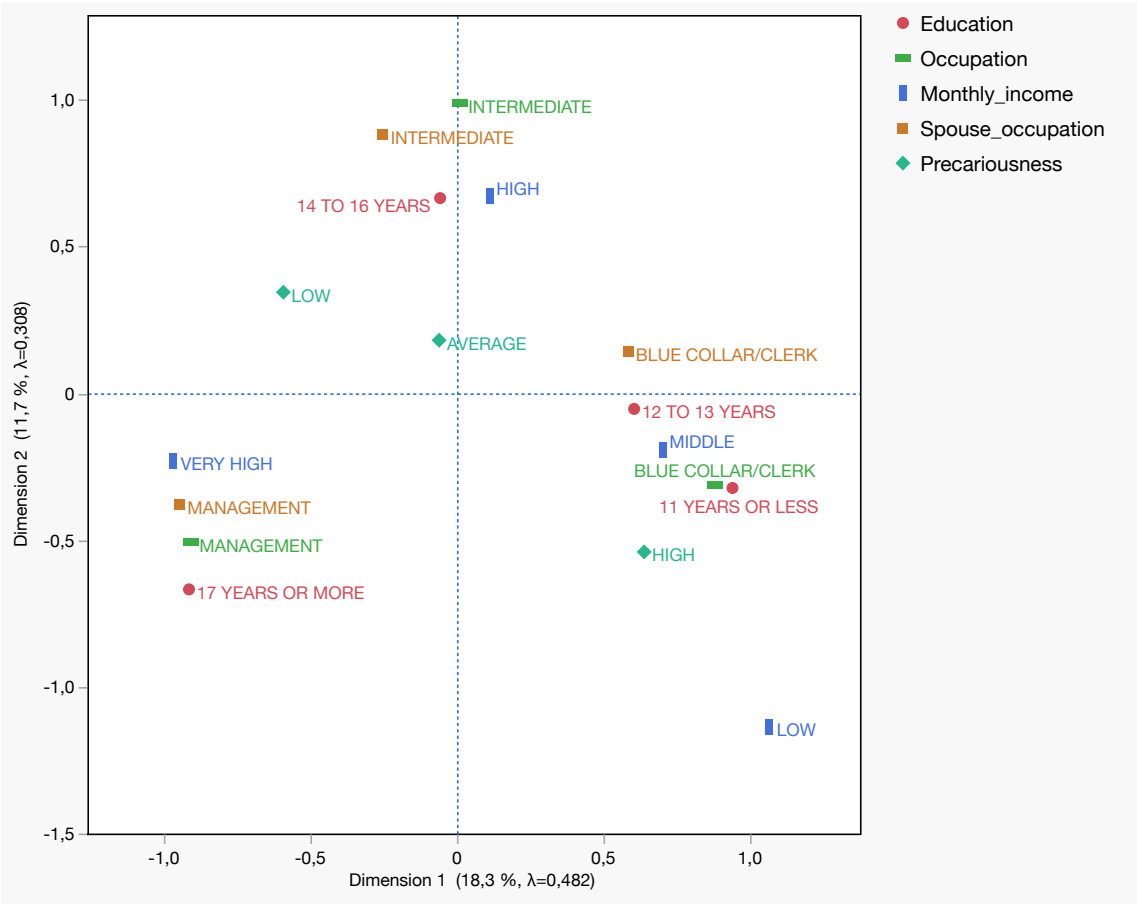

**Table S3:** Indicators of work environment of participants at inclusion.

|                                  |                | <b>n</b> | <b>%</b> |
|----------------------------------|----------------|----------|----------|
| <b>Commuting time</b>            | <b>&lt;1h</b>  | 72,604   | 76.4     |
|                                  | <b>1h-2h</b>   | 18,757   | 19.7     |
|                                  | <b>&gt;2h</b>  | 3648     | 3.9      |
| <b>Clocking in and out</b>       | <b>No</b>      | 74,281   | 77.8     |
|                                  | <b>Yes</b>     | 21,186   | 22.2     |
| <b>Regular working hours</b>     | <b>No</b>      | 53,085   | 55.4     |
|                                  | <b>Yes</b>     | 42,755   | 44.6     |
| <b>Long working hours</b>        | <b>No</b>      | 91,576   | 70.3     |
|                                  | <b>Yes</b>     | 38,621   | 29.7     |
| <b>Night work</b>                | <b>No</b>      | 118,011  | 90.6     |
|                                  | <b>Yes</b>     | 12,186   | 9.4      |
| <b>Dealing with the public</b>   | <b>No</b>      | 47,177   | 71.5     |
|                                  | <b>Yes</b>     | 18,801   | 28.5     |
| <b>Driving on public road</b>    | <b>No</b>      | 84,666   | 88.1     |
|                                  | <b>Yes</b>     | 11,397   | 11.9     |
| <b>Repetitive work</b>           | <b>No</b>      | 71,866   | 76.2     |
|                                  | <b>Yes</b>     | 22,401   | 23.8     |
| <b>Working with a screen</b>     | <b>No</b>      | 22,353   | 23.4     |
|                                  | <b>Yes</b>     | 73,266   | 76.6     |
| <b>Standing work posture</b>     | <b>No</b>      | 50,917   | 52.9     |
|                                  | <b>Yes</b>     | 45,246   | 47.1     |
| <b>Handling heavy loads</b>      | <b>No</b>      | 59,662   | 62.3     |
|                                  | <b>Yes</b>     | 36,112   | 37.7     |
| <b>Physically demanding work</b> | <b>No</b>      | 93,933   | 72.2     |
|                                  | <b>Yes</b>     | 36,264   | 27.8     |
| <b>Exposure to vibrations</b>    | <b>No</b>      | 91,992   | 96.6     |
|                                  | <b>Yes</b>     | 3290     | 3.4      |
| <b>Exposure to noise</b>         | <b>No</b>      | 92,000   | 70.7     |
|                                  | <b>Yes</b>     | 38,197   | 29.3     |
| <b>Outdoor work</b>              | <b>No</b>      | 87,810   | 90.2     |
|                                  | <b>Yes</b>     | 9492     | 9.8      |
| <b>Working in the cold</b>       | <b>No</b>      | 93,155   | 96.8     |
|                                  | <b>Yes</b>     | 3075     | 3.2      |
| <b>Working in the heat</b>       | <b>No</b>      | 92,140   | 95.6     |
|                                  | <b>Yes</b>     | 4257     | 4.4      |
| <b>Exposure to chemicals</b>     | <b>No</b>      | 86,472   | 66.4     |
|                                  | <b>Yes</b>     | 43,725   | 33.6     |
| <b>Effort-reward imbalance</b>   | <b>Low</b>     | 30,381   | 31.8     |
|                                  | <b>Average</b> | 36,199   | 37.9     |
|                                  | <b>High</b>    | 28,940   | 30.3     |

The percentages were calculated relatively to the total number of participants in the cohort.

**Figure S2:** Multiple correspondence analysis showing the association between the different occupational exposures used to characterize work environment of participants at inclusion. The plot uses the two first dimensions which explain respectively 16.8 and 12.0% of the total inertia (43.5 and 17.8% with Greenacre adjustment).

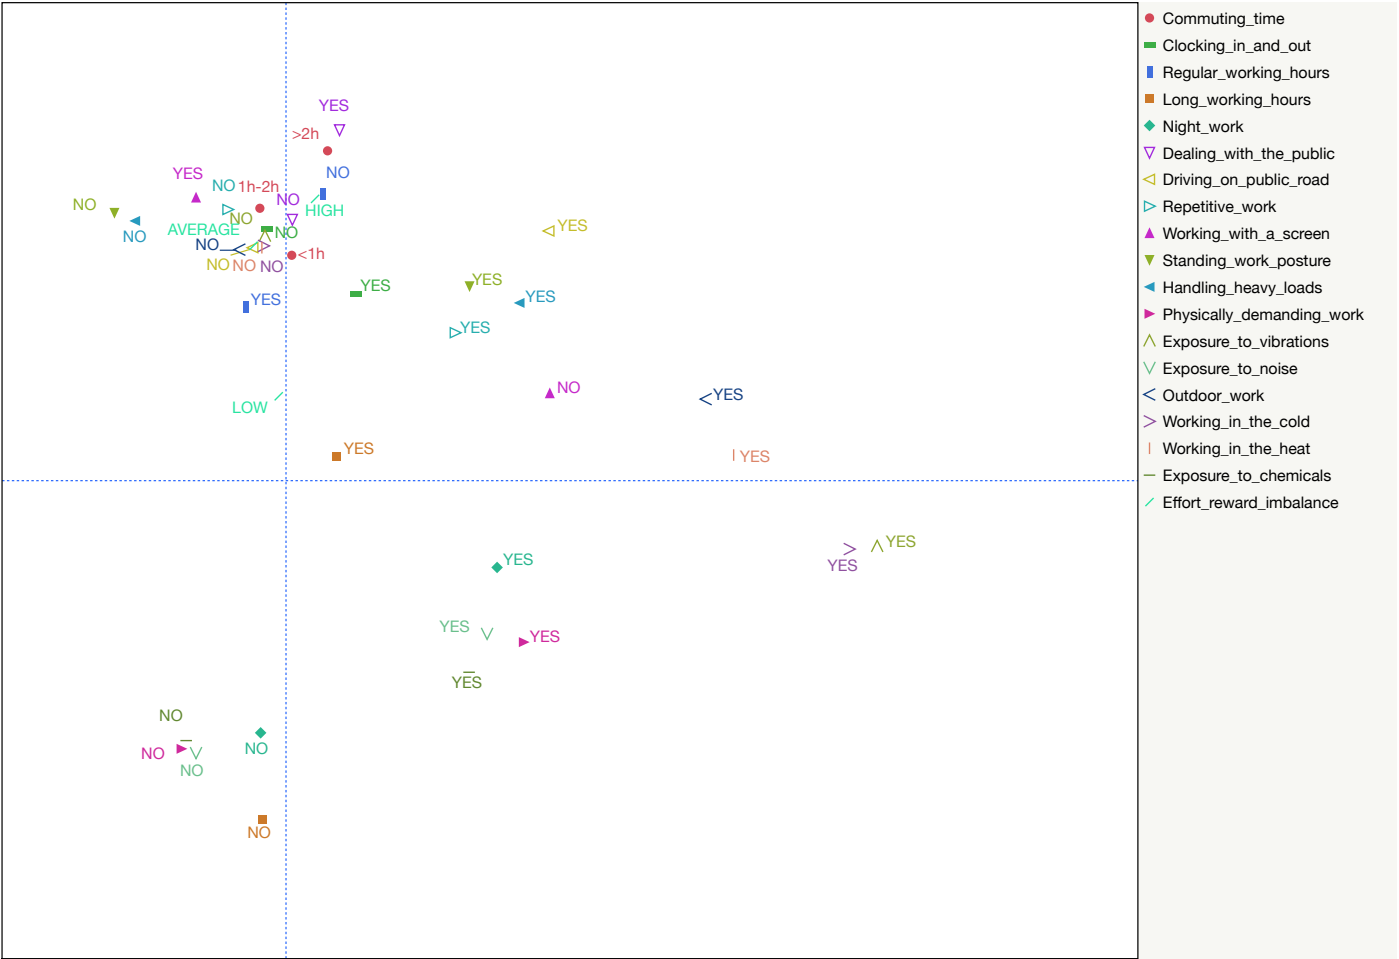

6

**Table S4:** Adjusted odds ratios (95% confidence interval, p) for the prevalence of cardiovascular events or cancers in participants at inclusion according to their exposure to common risk factors.

|                                                  |                   | <b>Cardiovascular event</b> |         | <b>Cancer</b>    |         |
|--------------------------------------------------|-------------------|-----------------------------|---------|------------------|---------|
| <b>Sex</b>                                       | <b>Women</b>      | 1.00                        |         | 1.00             |         |
|                                                  | <b>Men</b>        | 2.32 (2.09-2.58)            | <0.0001 | 0.61 (0.58-0.65) | <0.0001 |
| <b>Age (y)</b>                                   | <b>18-39</b>      | 1.00                        |         | 1.00             |         |
|                                                  | <b>40-54</b>      | 3.17 (2.50-4.02)            | <0.0001 | 3.30 (2.94-3.70) | <0.0001 |
|                                                  | <b>55-75</b>      | 6.72 (5.34-8.46)            | <0.0001 | 8.60 (7.70-9.61) | <0.0001 |
| <b>Parental history of cardiovascular event</b>  | <b>No</b>         | 1.00                        |         | 1.00             |         |
|                                                  | <b>Yes</b>        | 1.31 (1.20-1.44)            | <0.0001 | 0.97 (0.92-1.03) | 0.39    |
| <b>Parental history of cancer</b>                | <b>No</b>         | 1.00                        |         | 1.00             |         |
|                                                  | <b>Yes</b>        | 0.94 (0.86-1.03)            | 0.21    | 1.28 (1.22-1.35) | <0.0001 |
| <b>Lifetime non-moderate alcohol consumption</b> | <b>Rarely</b>     | 1.00                        |         | 1.00             |         |
|                                                  | <b>Sometimes</b>  | 0.95 (0.80-1.12)            | 0.51    | 0.99 (0.91-1.09) | 0.95    |
|                                                  | <b>Often</b>      | 0.90 (0.78-1.03)            | 0.12    | 0.94 (0.87-1.02) | 0.12    |
| <b>Smoking</b>                                   | <b>Never</b>      | 1.00                        |         | 1.00             |         |
|                                                  | <b>Former</b>     | 1.48 (1.34-1.63)            | <0.0001 | 1.10 (1.04-1.17) | 0.001   |
|                                                  | <b>Current</b>    | 1.37 (1.19-1.57)            | <0.0001 | 0.85 (0.78-0.92) | 0.0002  |
| <b>Leisure-time physical inactivity</b>          | <b>No</b>         | 1.00                        |         | 1.00             |         |
|                                                  | <b>Yes</b>        | 1.09 (0.94-1.27)            | 0.24    | 1.00 (0.91-1.11) | 0.93    |
| <b>Body mass index</b>                           | <b>Optimal</b>    | 1.00                        |         | 1.00             |         |
|                                                  | <b>Overweight</b> | 1.05 (0.94-1.16)            | 0.39    | 0.95 (0.89-1.01) | 0.09    |
|                                                  | <b>Obesity</b>    | 0.99 (0.87-1.12)            | 0.83    | 0.93 (0.85-1.01) | 0.09    |
| <b>Hypertension</b>                              | <b>No</b>         | 1.00                        |         | 1.00             |         |
|                                                  | <b>Yes</b>        | 2.17 (1.96-2.39)            | <0.0001 | 1.05 (0.97-1.24) | 0.19    |
| <b>Dyslipidemia</b>                              | <b>No</b>         | 1.00                        |         | 1.00             |         |
|                                                  | <b>Yes</b>        | 5.89 (5.34-6.49)            | <0.0001 | 1.07 (0.98-1.37) | 0.11    |
| <b>Diabetes</b>                                  | <b>No</b>         | 1.00                        |         | 1.00             |         |
|                                                  | <b>Yes</b>        | 1.11 (0.94-1.31)            | 0.20    | 1.11 (0.94-1.30) | 0.22    |
| <b>Sleep disorders</b>                           | <b>No</b>         | 1.00                        |         | 1.00             |         |
|                                                  | <b>Yes</b>        | 1.15 (1.05-1.26)            | 0.003   | 1.16 (1.09-1.23) | <0.0001 |
| <b>Depression</b>                                | <b>No</b>         | 1.00                        |         | 1.00             |         |
|                                                  | <b>Yes</b>        | 1.29 (1.14-1.46)            | <0.0001 | 1.09 (1.01-1.18) | 0.03    |

Models were adjusted for sex, age, parental history of cardiovascular event, parental history of cancer, social position, work environment, unemployment duration, lifetime non-moderate alcohol consumption, smoking, leisure-time physical inactivity, body mass index, hypertension, dyslipidemia, diabetes, sleep disorders and depression.

6

**Table S5:** Adjusted odds ratios (95% confidence interval) for the prevalence of specific non-fatal cancers in participants at inclusion according to unemployment duration.

| Body location | Unemployment duration (quarters) | n    | %    | Models 1         | p     | Models 2         | p    | Models 3         | p    |
|---------------|----------------------------------|------|------|------------------|-------|------------------|------|------------------|------|
| All           | 0                                | 5018 | 4.50 | 1.00             |       | 1.00             |      | 1.00             |      |
|               | 1-19                             | 532  | 4.19 | 0.95 (0.86-1.04) | 0.25  | 0.95 (0.87-1.05) | 0.37 | 0.95 (0.87-1.05) | 0.31 |
|               | 20-148                           | 380  | 6.24 | 0.98 (0.88-1.09) | 0.71  | 0.96 (0.86-1.07) | 0.47 | 0.96 (0.86-1.07) | 0.44 |
| Breast        | 0                                | 1300 | 1.17 | 1.00             |       | 1.00             |      | 1.00             |      |
|               | 1-19                             | 162  | 1.28 | 1.02 (0.86-1.21) | 0.80  | 1.04 (0.88-1.23) | 0.66 | 1.03 (0.87-1.22) | 0.73 |
|               | 20-148                           | 128  | 2.10 | 1.03 (0.85-1.24) | 0.79  | 1.02 (0.84-1.23) | 0.86 | 1.01 (0.83-1.22) | 0.94 |
| Skin          | 0                                | 1267 | 1.14 | 1.00             |       | 1.00             |      | 1.00             |      |
|               | 1-19                             | 129  | 1.02 | 0.92 (0.76-1.10) | 0.35  | 0.95 (0.79-1.15) | 0.62 | 0.96 (0.80-1.15) | 0.67 |
|               | 20-148                           | 69   | 1.13 | 0.72 (0.56-0.92) | 0.009 | 0.77 (0.60-0.98) | 0.03 | 0.78 (0.61-1.01) | 0.06 |
| Prostate      | 0                                | 611  | 0.55 | 1.00             |       | 1.00             |      | 1.00             |      |
|               | 1-19                             | 39   | 0.31 | 0.72 (0.52-1.00) | 0.05  | 0.75 (0.54-1.04) | 0.09 | 0.76 (0.55-1.06) | 0.11 |
|               | 20-148                           | 34   | 0.56 | 0.92 (0.65-1.31) | 0.65  | 0.91 (0.64-1.29) | 0.59 | 0.94 (0.66-1.33) | 0.71 |
| Cervical      | 0                                | 254  | 0.23 | 1.00             |       | 1.00             |      | 1.00             |      |
|               | 1-19                             | 38   | 0.30 | 1.19 (0.85-1.68) | 0.31  | 1.15 (0.81-1.61) | 0.44 | 1.11 (0.78-1.56) | 0.56 |
|               | 20-148                           | 33   | 0.54 | 1.54 (1.07-2.22) | 0.02  | 1.36 (0.94-1.97) | 0.10 | 1.26 (0.87-1.83) | 0.22 |
| Colon         | 0                                | 259  | 0.23 | 1.00             |       | 1.00             |      | 1.00             |      |
|               | 1-19                             | 33   | 0.26 | 1.22 (0.85-1.76) | 0.28  | 1.24 (0.86-1.79) | 0.24 | 1.23 (0.85-1.78) | 0.26 |
|               | 20-148                           | 19   | 0.31 | 0.95 (0.60-1.52) | 0.84  | 0.92 (0.57-1.47) | 0.71 | 0.92 (0.57-1.47) | 0.72 |
| Thyroid       | 0                                | 270  | 0.24 | 1.00             |       | 1.00             |      | 1.00             |      |
|               | 1-19                             | 36   | 0.28 | 1.12 (0.79-1.59) | 0.52  | 1.10 (0.78-1.56) | 0.59 | 1.11 (0.78-1.57) | 0.57 |
|               | 20-148                           | 19   | 0.31 | 0.89 (0.56-1.43) | 0.64  | 0.84 (0.53-1.35) | 0.48 | 0.87 (0.54-1.40) | 0.56 |
| Lymphoma      | 0                                | 263  | 0.24 | 1.00             |       | 1.00             |      | 1.00             |      |
|               | 1-19                             | 23   | 0.18 | 0.79 (0.52-1.22) | 0.29  | 0.79 (0.52-1.21) | 0.28 | 0.79 (0.51-1.21) | 0.27 |
|               | 20-148                           | 18   | 0.30 | 1.11 (0.68-1.79) | 0.67  | 1.08 (0.67-1.76) | 0.75 | 1.07 (0.66-1.74) | 0.78 |
| Lung          | 0                                | 69   | 0.06 | 1.00             |       | 1.00             |      | 1.00             |      |
|               | 1-19                             | 4    | 0.03 | 0.56 (0.20-1.54) | 0.26  | 0.53 (0.19-1.45) | 0.22 | 0.50 (0.18-1.38) | 0.18 |
|               | 20-148                           | 5    | 0.08 | 1.08 (0.43-2.68) | 0.87  | 0.92 (0.37-2.30) | 0.86 | 0.84 (0.33-2.11) | 0.71 |

The percentages were calculated relatively to the number of participants for each unemployment duration (0 quarter=111,407; 1-19 quarters=12,702; 20-148 quarters=6088).

Models 1 were adjusted for sex, age and parental history of cancer.

Models 2 were adjusted for sex, age, parental history of cancer, social position and work environment.

Models 3 were adjusted for sex, age, parental history of cancer, work environment, unemployment duration, lifetime non-moderate alcohol consumption, smoking, body mass index and sleep disorders.

8

**Figure S3:** Age differences between the occurrence of unemployment episodes, cardiovascular events and cancers during the lifetime of participants. The mean age at which each cardiovascular event or cancer occurred was compared to the mean age at which unemployment episodes happened. In each box plot, the horizontal line represents the median value, the ends and the length of the box represent the 1st and 3rd quartiles and the interquartile range (IR) respectively, the lines from each end of the box extend to the outermost values that fall within 1st quartile  $-1.5 \times \text{IR}$  and 3rd quartile  $+1.5 \times \text{IR}$ , values outside this interval are presented as individual points. The differences were assessed with the non-parametric Wilcoxon-Mann-Whitney test. \*\*\*  $p < 0.0001$ .

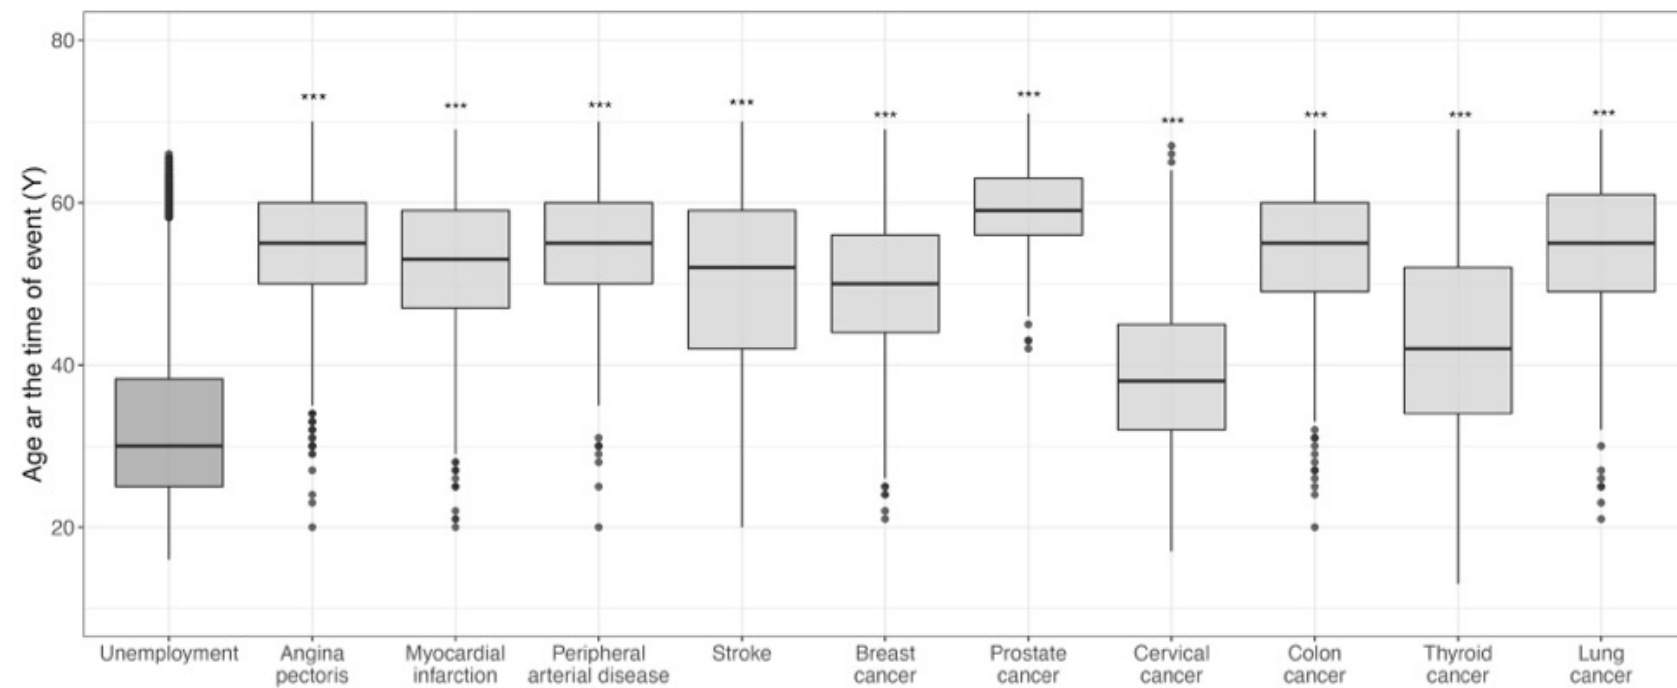

8



9

**Table S6:** Multi-adjusted odds ratios (95% confidence interval) for the prevalence of non-fatal cardiovascular events in men and women at inclusion according to their social position, work environment and unemployment exposure.

environment and unemployment exposure.

|                                  |         | Type of event               | Men              |         | Women            |        |
|----------------------------------|---------|-----------------------------|------------------|---------|------------------|--------|
|                                  |         |                             | OR               | p       | OR               | p      |
| Social position                  | High    | All                         | 1.00             |         | 1.00             |        |
|                                  | Middle  |                             | 1.14 (0.98-1.32) | 0.08    | 1.05 (0.83-1.34) | 0.66   |
|                                  | Low     |                             | 1.29 (1.10-1.51) | 0.002   | 1.24 (0.95-1.62) | 0.11   |
|                                  | High    | Stroke                      | 1.00             |         | 1.00             |        |
|                                  | Middle  |                             | 1.03 (0.80-1.32) | 0.81    | 0.96 (0.73-1.27) | 0.80   |
|                                  | Low     |                             | 1.20 (0.91-1.57) | 0.19    | 0.97 (0.70-1.34) | 0.84   |
|                                  | High    | Angina pectoris             | 1.00             |         | 1.00             |        |
|                                  | Middle  |                             | 1.17 (0.91-1.49) | 0.22    | 2.26 (1.17-4.37) | 0.01   |
|                                  | Low     |                             | 1.20 (0.92-1.56) | 0.18    | 3.45 (1.73-6.91) | 0.0005 |
|                                  | High    | Myocardial infarction       | 1.00             |         | 1.00             |        |
|                                  | Middle  |                             | 1.11 (0.88-1.39) | 0.39    | 0.79 (0.47-1.33) | 0.37   |
|                                  | Low     |                             | 1.27 (1.00-1.61) | 0.05    | 0.81 (0.45-1.47) | 0.49   |
|                                  | High    | Peripheral arterial disease | 1.00             |         | 1.00             |        |
|                                  | Middle  |                             | 1.36 (0.84-2.20) | 0.22    | 0.91 (0.44-1.90) | 0.80   |
|                                  | Low     |                             | 2.19 (1.35-3.55) | 0.002   | 1.47 (0.66-3.27) | 0.35   |
| Work environment                 | Good    | All                         | 1.00             |         | 1.00             |        |
|                                  | Average |                             | 0.89 (0.74-1.06) | 0.20    | 0.99 (0.77-1.27) | 0.94   |
|                                  | Bad     |                             | 1.24 (1.06-1.46) | 0.009   | 1.25 (0.99-1.59) | 0.06   |
|                                  | Good    | Stroke                      | 1.00             |         | 1.00             |        |
|                                  | Average |                             | 0.93 (0.69-1.26) | 0.65    | 0.95 (0.71-1.28) | 0.76   |
|                                  | Bad     |                             | 1.25 (0.95-1.65) | 0.11    | 1.21 (0.90-1.61) | 0.20   |
|                                  | Good    | Angina pectoris             | 1.00             |         | 1.00             |        |
|                                  | Average |                             | 0.76 (0.56-1.03) | 0.08    | 0.97 (0.56-1.68) | 0.90   |
|                                  | Bad     |                             | 1.11 (0.85-1.44) | 0.44    | 1.04 (0.63-1.74) | 0.87   |
|                                  | Good    | Myocardial infarction       | 1.00             |         | 1.00             |        |
|                                  | Average |                             | 0.99 (0.75-1.31) | 0.97    | 0.83 (0.47-1.43) | 0.49   |
|                                  | Bad     |                             | 1.21 (0.94-1.55) | 0.14    | 0.81 (0.48-1.37) | 0.43   |
|                                  | Good    | Peripheral arterial disease | 1.00             |         | 1.00             |        |
|                                  | Average |                             | 0.93 (0.53-1.61) | 0.79    | 0.80 (0.38-1.65) | 0.54   |
|                                  | Bad     |                             | 1.32 (0.82-2.14) | 0.26    | 0.86 (0.42-1.75) | 0.68   |
| Unemployment duration (quarters) | 0       | All                         | 1.00             |         | 1.00             |        |
|                                  | 1-19    |                             | 1.05 (0.87-1.26) | 0.60    | 0.83 (0.60-1.13) | 0.23   |
|                                  | 20-148  |                             | 1.55 (1.27-1.88) | <0.0001 | 1.16 (0.86-1.56) | 0.33   |
|                                  | 0       | Stroke                      | 1.00             |         | 1.00             |        |
|                                  | 1-19    |                             | 0.85 (0.60-1.21) | 0.38    | 0.84 (0.57-1.22) | 0.36   |
|                                  | 20-148  |                             | 1.18 (0.82-1.72) | 0.37    | 1.06 (0.71-1.57) | 0.79   |
|                                  | 0       | Angina pectoris             | 1.00             |         | 1.00             |        |
|                                  | 1-19    |                             | 1.06 (0.78-1.45) | 0.70    | 0.98 (0.54-1.81) | 0.96   |
|                                  | 20-148  |                             | 1.77 (1.30-2.40) | 0.0003  | 0.69 (0.33-1.45) | 0.33   |
|                                  | 0       | Myocardial infarction       | 1.00             |         | 1.00             |        |
|                                  | 1-19    |                             | 1.16 (0.88-1.51) | 0.29    | 0.88 (0.42-1.84) | 0.74   |
|                                  | 20-148  |                             | 1.58 (1.19-2.10) | 0.002   | 1.92 (1.06-3.49) | 0.03   |
|                                  | 0       | Peripheral arterial disease | 1.00             |         | 1.00             |        |
|                                  | 1-19    |                             | 1.15 (0.72-1.86) | 0.55    | 0.88 (0.35-2.24) | 0.79   |
|                                  | 20-148  |                             | 1.89 (1.21-2.97) | 0.005   | 1.31 (0.54-3.18) | 0.54   |

Logistic regression models included social position, work environment and unemployment duration and were adjusted for age, parental history of cardiovascular event, lifetime non-moderate alcohol consumption, smoking, leisure-time physical inactivity, body mass index, hypertension, dyslipidemia, diabetes, sleep disorders and depression.

9

10

**Table S7:** Multi-adjusted odds ratios (95% confidence interval) for the prevalence of non-fatal cancers in men and women at inclusion according to their social position and work environment.

|                  |          | Body location | Men              |                  | Women            |         |
|------------------|----------|---------------|------------------|------------------|------------------|---------|
|                  |          |               | OR               | p                | OR               | p       |
| Social position  | High     | All           | 1.00             |                  | 1.00             |         |
|                  | Middle   |               | 0.90 (0.81-1.01) | 0.07             | 1.02 (0.94-1.12) | 0.59    |
|                  | Low      |               | 0.81 (0.72-0.92) | 0.001            | 1.10 (0.99-1.23) | 0.08    |
|                  | High     | Breast        | N/A              |                  | 1.00             |         |
|                  | Middle   |               |                  |                  | 0.94 (0.82-1.07) | 0.37    |
|                  | Low      |               |                  |                  | 0.97 (0.83-1.13) | 0.71    |
|                  | High     | Skin          | 1.00             |                  | 1.00             |         |
|                  | Middle   |               | 0.76 (0.63-0.91) | 0.004            | 0.91 (0.76-1.08) | 0.28    |
|                  | Low      |               | 0.59 (0.47-0.75) | <0.0001          | 0.78 (0.63-0.98) | 0.03    |
|                  | High     | Prostate      | 1.00             |                  | N/A              |         |
|                  | Middle   |               | 0.92 (0.74-1.14) | 0.44             |                  |         |
|                  | Low      |               | 0.84 (0.67-1.06) | 0.14             |                  |         |
| High             | Cervical | N/A           |                  | 1.00             |                  |         |
| Middle           |          |               |                  | 1.37 (1.01-1.86) | 0.04             |         |
| Low              |          |               |                  | 1.72 (1.21-2.45) | 0.002            |         |
| Work environment | High     | Colon         | 1.00             |                  | 1.00             |         |
|                  | Middle   |               | 1.68 (1.08-2.63) | 0.02             | 0.75 (0.47-1.19) | 0.22    |
|                  | Low      |               | 1.17 (0.70-1.95) | 0.54             | 1.22 (0.75-1.98) | 0.43    |
|                  | High     | Thyroid       | 1.00             |                  | 1.00             |         |
|                  | Middle   |               | 1.56 (0.84-2.89) | 0.16             | 1.18 (0.84-1.65) | 0.33    |
|                  | Low      |               | 1.41 (0.67-3.00) | 0.37             | 1.38 (0.94-2.04) | 0.10    |
|                  | High     | Lymphoma      | 1.00             |                  | 1.00             |         |
|                  | Middle   |               | 1.07 (0.72-1.59) | 0.75             | 1.28 (0.81-2.02) | 0.30    |
|                  | Low      |               | 1.04 (0.65-1.68) | 0.86             | 1.25 (0.72-2.17) | 0.43    |
|                  | High     | Lung          | 1.00             |                  | 1.00             |         |
|                  | Middle   |               | 1.14 (0.51-2.57) | 0.75             | 0.99 (0.30-3.31) | 0.99    |
|                  | Low      |               | 1.73 (0.74-4.03) | 0.20             | 1.94 (0.56-6.69) | 0.29    |
|                  | Good     | All           | 1.00             |                  | 1.00             |         |
|                  | Average  |               | 0.88 (0.76-1.01) | 0.07             | 0.99 (0.90-1.09) | 0.79    |
|                  | Bad      |               | 1.75 (1.54-1.98) | <0.0001          | 1.36 (1.24-1.49) | <0.0001 |
|                  | Good     | Breast        | N/A              |                  | 1.00             |         |
|                  | Average  |               |                  |                  | 0.94 (0.81-1.09) | 0.41    |
|                  | Bad      |               |                  |                  | 1.29 (1.13-1.48) | 0.0002  |
|                  | Good     | Skin          | 1.00             |                  | 1.00             |         |
|                  | Average  |               | 0.99 (0.78-1.27) | 0.98             | 0.88 (0.72-1.06) | 0.18    |
|                  | Bad      |               | 1.58 (1.26-1.98) | <0.0001          | 1.25 (1.03-1.50) | 0.02    |
|                  | Good     | Prostate      | 1.00             |                  | N/A              |         |
|                  | Average  |               | 0.68 (0.46-1.01) | 0.06             |                  |         |
|                  | Bad      |               | 3.02 (2.29-3.99) | <0.0001          |                  |         |
| Good             | Cervical | N/A           |                  | 1.00             |                  |         |
| Average          |          |               |                  | 0.95 (0.70-1.27) | 0.71             |         |
| Bad              |          |               |                  | 1.17 (0.87-1.58) | 0.28             |         |
|                  | Good     | Colon         | 1.00             |                  | 1.00             |         |
|                  | Average  |               | 0.73 (0.41-1.30) | 0.29             | 1.67 (0.94-2.97) | 0.08    |
|                  | Bad      |               | 1.74 (1.08-2.79) | 0.02             | 2.50 (1.48-4.22) | 0.0006  |
|                  | Good     | Thyroid       | 1.00             |                  | 1.00             |         |
|                  | Average  |               | 0.96 (0.50-1.82) | 0.89             | 1.21 (0.86-1.70) | 0.27    |
|                  | Bad      |               | 0.87 (0.44-1.71) | 0.68             | 1.28 (0.90-1.81) | 0.17    |
|                  | Good     | Lymphoma      | 1.00             |                  | 1.00             |         |
|                  | Average  |               | 0.69 (0.44-1.09) | 0.11             | 0.82 (0.53-1.29) | 0.40    |
|                  | Bad      |               | 0.96 (0.63-1.48) | 0.87             | 1.11 (0.71-1.76) | 0.64    |
|                  | Good     | Lung          | 1.00             |                  | 1.00             |         |
|                  | Average  |               | 1.62 (0.61-4.24) | 0.33             | 0.54 (0.16-1.86) | 0.33    |
|                  | Bad      |               | 1.54 (0.60-3.96) | 0.37             | 1.02 (0.38-2.75) | 0.97    |

Logistic regression models included social position, work environment and unemployment duration and were adjusted for age, parental history of cancer, lifetime non-moderate alcohol consumption, smoking, body mass index and sleep disorders. NA: non applicable.

10
